# Supplementary material
Source: PubMed Central journal article supplement (PMC5482415)
Supplement: NIHMS776374-supplement.pdf [file NIHMS776374-supplement.pdf]

**Appendix**  
**Correlates of Sun Protection and Sunburn in Children of Melanoma Survivors**  
**Tripp et al.**

**Appendix Table 1.** Correlates of Children’s Sun Protection Behaviors in Multivariable Analyses, N=340 Melanoma Survivors Reporting on One of Their Children

**A. Sunscreen**

| Independent variables               | Sunscreen                     |              |                  |
|-------------------------------------|-------------------------------|--------------|------------------|
|                                     | Adjusted R <sup>2</sup> : 36% |              |                  |
|                                     | <i>B</i>                      | SE           | <i>p</i> -value  |
| <i>Child</i>                        |                               |              |                  |
| Age                                 | <b>0.035</b>                  | <b>0.009</b> | <b>&lt;0.001</b> |
| <i>Survivor</i>                     |                               |              |                  |
| No. melanomas                       | <b>0.142</b>                  | <b>0.070</b> | <b>0.04</b>      |
| Sunscreen self-efficacy             | 0.051                         | 0.046        | 0.27             |
| Sunscreen outcome expectations      | -0.046                        | 0.043        | 0.28             |
| Tanning outcome expectations        | -0.025                        | 0.034        | 0.47             |
| Sunscreen intentions                | <b>0.154</b>                  | <b>0.041</b> | <b>&lt;0.001</b> |
| Sunscreen accessibility             | 0.248                         | 0.159        | 0.12             |
| Perceived risk, skin cancer         | 0.045                         | 0.052        | 0.40             |
| Perceived benefits of sunscreen     | 0.095                         | 0.058        | 0.10             |
| Doctor/HCP sunscreen recommendation | 0.093                         | 0.087        | 0.29             |
| Knowledge                           | 0.002                         | 0.035        | 0.96             |
| Sunscreen behavior                  | <b>0.342</b>                  | <b>0.054</b> | <b>&lt;0.001</b> |

**B. Wide-brimmed hat**

| Independent variables        | Wide-brimmed hat              |              |                  |
|------------------------------|-------------------------------|--------------|------------------|
|                              | Adjusted R <sup>2</sup> : 48% |              |                  |
|                              | <i>B</i>                      | SE           | <i>p</i> -value  |
| <i>Child</i>                 |                               |              |                  |
| Age                          | <b>-0.029</b>                 | <b>0.012</b> | <b>0.02</b>      |
| <i>Survivor</i>              |                               |              |                  |
| Ethnicity                    | <b>0.491</b>                  | <b>0.237</b> | <b>0.04</b>      |
| No. melanomas                | 0.080                         | 0.070        | 0.26             |
| Hat self-efficacy            | <b>0.112</b>                  | <b>0.048</b> | <b>0.02</b>      |
| Hat outcome expectations     | <b>-0.141</b>                 | <b>0.057</b> | <b>0.014</b>     |
| Tanning outcome expectations | <b>-0.105</b>                 | <b>0.045</b> | <b>0.02</b>      |
| Hat intentions               | <b>0.099</b>                  | <b>0.048</b> | <b>0.04</b>      |
| Hat availability             | <b>0.709</b>                  | <b>0.117</b> | <b>&lt;0.001</b> |
| Hat accessibility            | -0.134                        | 0.126        | 0.29             |
| Perceived risk, sunburn      | 0.031                         | 0.058        | 0.60             |
| Perceived risk, skin cancer  | 0.073                         | 0.071        | 0.31             |
| Knowledge                    | 0.020                         | 0.047        | 0.68             |
| Wide-brimmed hat behavior    | <b>0.107</b>                  | <b>0.040</b> | <b>0.008</b>     |

**Appendix**  
**Correlates of Sun Protection and Sunburn in Children of Melanoma Survivors**  
**Tripp et al.**

**C. Clothing**

| Independent variables                  | Clothing                      |              |                  |
|----------------------------------------|-------------------------------|--------------|------------------|
|                                        | Adjusted R <sup>2</sup> : 30% |              |                  |
|                                        | <i>B</i>                      | SE           | <i>p</i> -value  |
| <i>Child</i>                           |                               |              |                  |
| Age                                    | -0.017                        | 0.010        | 0.07             |
| Sex                                    | <b>-0.165</b>                 | <b>0.075</b> | <b>0.03</b>      |
| <i>Survivor</i>                        |                               |              |                  |
| Clothing self-efficacy                 | 0.028                         | 0.042        | 0.50             |
| Clothing outcome expectations          | <b>-0.126</b>                 | <b>0.047</b> | <b>0.008</b>     |
| Clothing intentions                    | 0.045                         | 0.043        | 0.29             |
| Clothing availability                  | 0.199                         | 0.105        | 0.06             |
| Clothing accessibility                 | 0.149                         | 0.121        | 0.22             |
| Perceived risk, skin cancer            | -0.003                        | 0.058        | 0.95             |
| Doctor/HCP hat/clothing recommendation | 0.056                         | 0.075        | 0.45             |
| Knowledge                              | 0.050                         | 0.038        | 0.19             |
| Clothing behavior                      | <b>0.291</b>                  | <b>0.054</b> | <b>&lt;0.001</b> |

**D. Sunglasses**

| Independent variables      | Sunglasses                    |              |                  |
|----------------------------|-------------------------------|--------------|------------------|
|                            | Adjusted R <sup>2</sup> : 11% |              |                  |
|                            | <i>B</i>                      | SE           | <i>p</i> -value  |
| <i>Survivor</i>            |                               |              |                  |
| Marital status             | -0.359                        | 0.188        | 0.06             |
| No. melanomas              | <b>0.229</b>                  | <b>0.109</b> | <b>0.04</b>      |
| Time since diagnosis       | <b>0.052</b>                  | <b>0.014</b> | <b>&lt;0.001</b> |
| Family history of melanoma | 0.226                         | 0.132        | 0.09             |
| Sunglasses behavior        | <b>0.210</b>                  | <b>0.051</b> | <b>&lt;0.001</b> |

**Appendix**  
**Correlates of Sun Protection and Sunburn in Children of Melanoma Survivors**  
**Tripp et al.**

**E. Shade**

| Independent variables        | Shade                         |              |                  |
|------------------------------|-------------------------------|--------------|------------------|
|                              | Adjusted R <sup>2</sup> : 37% |              |                  |
|                              | <i>B</i>                      | SE           | <i>p</i> -value  |
| <i>Child</i>                 |                               |              |                  |
| Age                          | <b>-0.041</b>                 | <b>0.009</b> | <b>&lt;0.001</b> |
| <i>Survivor</i>              |                               |              |                  |
| Shade self-efficacy          | <b>0.127</b>                  | <b>0.043</b> | <b>0.003</b>     |
| Shade outcome expectations   | <b>-0.120</b>                 | <b>0.043</b> | <b>0.005</b>     |
| Tanning outcome expectations | -0.011                        | 0.032        | 0.72             |
| Shade intentions             | <b>0.077</b>                  | <b>0.038</b> | <b>0.04</b>      |
| Shade availability           | 0.137                         | 0.074        | 0.07             |
| Knowledge                    | 0.040                         | 0.031        | 0.21             |
| Shade behavior               | <b>0.180</b>                  | <b>0.047</b> | <b>&lt;0.001</b> |

**F. Limiting time**

| Independent variables               | Limiting time                 |              |                  |
|-------------------------------------|-------------------------------|--------------|------------------|
|                                     | Adjusted R <sup>2</sup> : 45% |              |                  |
|                                     | <i>B</i>                      | SE           | <i>p</i> -value  |
| <i>Child</i>                        |                               |              |                  |
| Age                                 | <b>-0.044</b>                 | <b>0.013</b> | <b>0.001</b>     |
| <i>Survivor</i>                     |                               |              |                  |
| Sex                                 | -0.024                        | 0.102        | 0.82             |
| Marital status                      | 0.138                         | 0.170        | 0.42             |
| Limiting time self-efficacy         | 0.061                         | 0.065        | 0.35             |
| Limiting time outcome expectations  | -0.069                        | 0.064        | 0.29             |
| Tanning outcome expectations        | -0.051                        | 0.047        | 0.28             |
| Limiting time intentions            | <b>0.274</b>                  | <b>0.054</b> | <b>&lt;0.001</b> |
| Perceived risk, skin cancer         | 0.077                         | 0.073        | 0.29             |
| Knowledge                           | 0.042                         | 0.049        | 0.39             |
| Worry child may develop skin cancer | 0.077                         | 0.064        | 0.23             |
| Limiting time behavior              | <b>0.342</b>                  | <b>0.052</b> | <b>&lt;0.001</b> |

**Appendix**  
**Correlates of Sun Protection and Sunburn in Children of Melanoma Survivors**  
**Tripp et al.**

**G. Sun protection composite**

| Independent variables           | Sun protection composite      |              |                  |
|---------------------------------|-------------------------------|--------------|------------------|
|                                 | Adjusted R <sup>2</sup> : 60% |              |                  |
|                                 | <i>B</i>                      | SE           | <i>p</i> -value  |
| <i>Child</i>                    |                               |              |                  |
| Age                             | <b>-0.020</b>                 | <b>0.006</b> | <b>0.001</b>     |
| <i>Survivor</i>                 |                               |              |                  |
| Time since diagnosis            | <b>0.013</b>                  | <b>0.006</b> | <b>0.030</b>     |
| Shade self-efficacy             | <b>0.098</b>                  | <b>0.032</b> | <b>0.003</b>     |
| Clothing outcome expectations   | <b>-0.068</b>                 | <b>0.029</b> | <b>0.020</b>     |
| Sunscreen behavioral intentions | <b>0.099</b>                  | <b>0.028</b> | <b>0.001</b>     |
| Perceived risk, sunburn         | <b>0.091</b>                  | <b>0.028</b> | <b>0.001</b>     |
| Hat availability                | <b>0.180</b>                  | <b>0.056</b> | <b>0.001</b>     |
| Sun protection composite        | <b>0.326</b>                  | <b>0.049</b> | <b>&lt;0.001</b> |

*Note:* A potential correlate was included in Tables 4A-4F if it was associated ( $p < 0.10$ ) with the behavior in univariate analyses. *B*, SE and *p*-value estimates are from the multivariable model. Boldface indicates statistical significance ( $p < 0.05$ ). Given the large number of potential correlates that were associated ( $p < 0.10$ ) with the sun protection composite in univariate analyses, but were not significantly associated ( $p < 0.05$ ) in the multivariable model, only variables that were significantly associated with the sun protection composite in the multivariable model are included in Appendix Table 1G. *B*, SE and *p*-value estimates are from the multivariable model  
HCP, health care provider
